# Supplementary material for: Sewage effects at the end of the world: impact on the intertidal macrobenthic community in the Beagle Channel
Source: Research Square preprint supplement (doi:10.21203/rs.3.rs-8595460/v1), 2026-01-21

**SUPPLEMENTARY MATERIAL**

**SEWAGE EFFECTS AT THE END OF THE WORLD: IMPACT ON THE INTERTIDAL MACROBENTHIC COMMUNITY IN THE BEAGLE CHANNEL.**

Facundo Manuel Llompart1, Sergio Matías Delpiani2, Julieta Sánchez1, Lourdes Higueras2, Cecilia Paula Alonso2, Antia Hervias2, Melina Pellegrino2, Sebastián Poljak2.


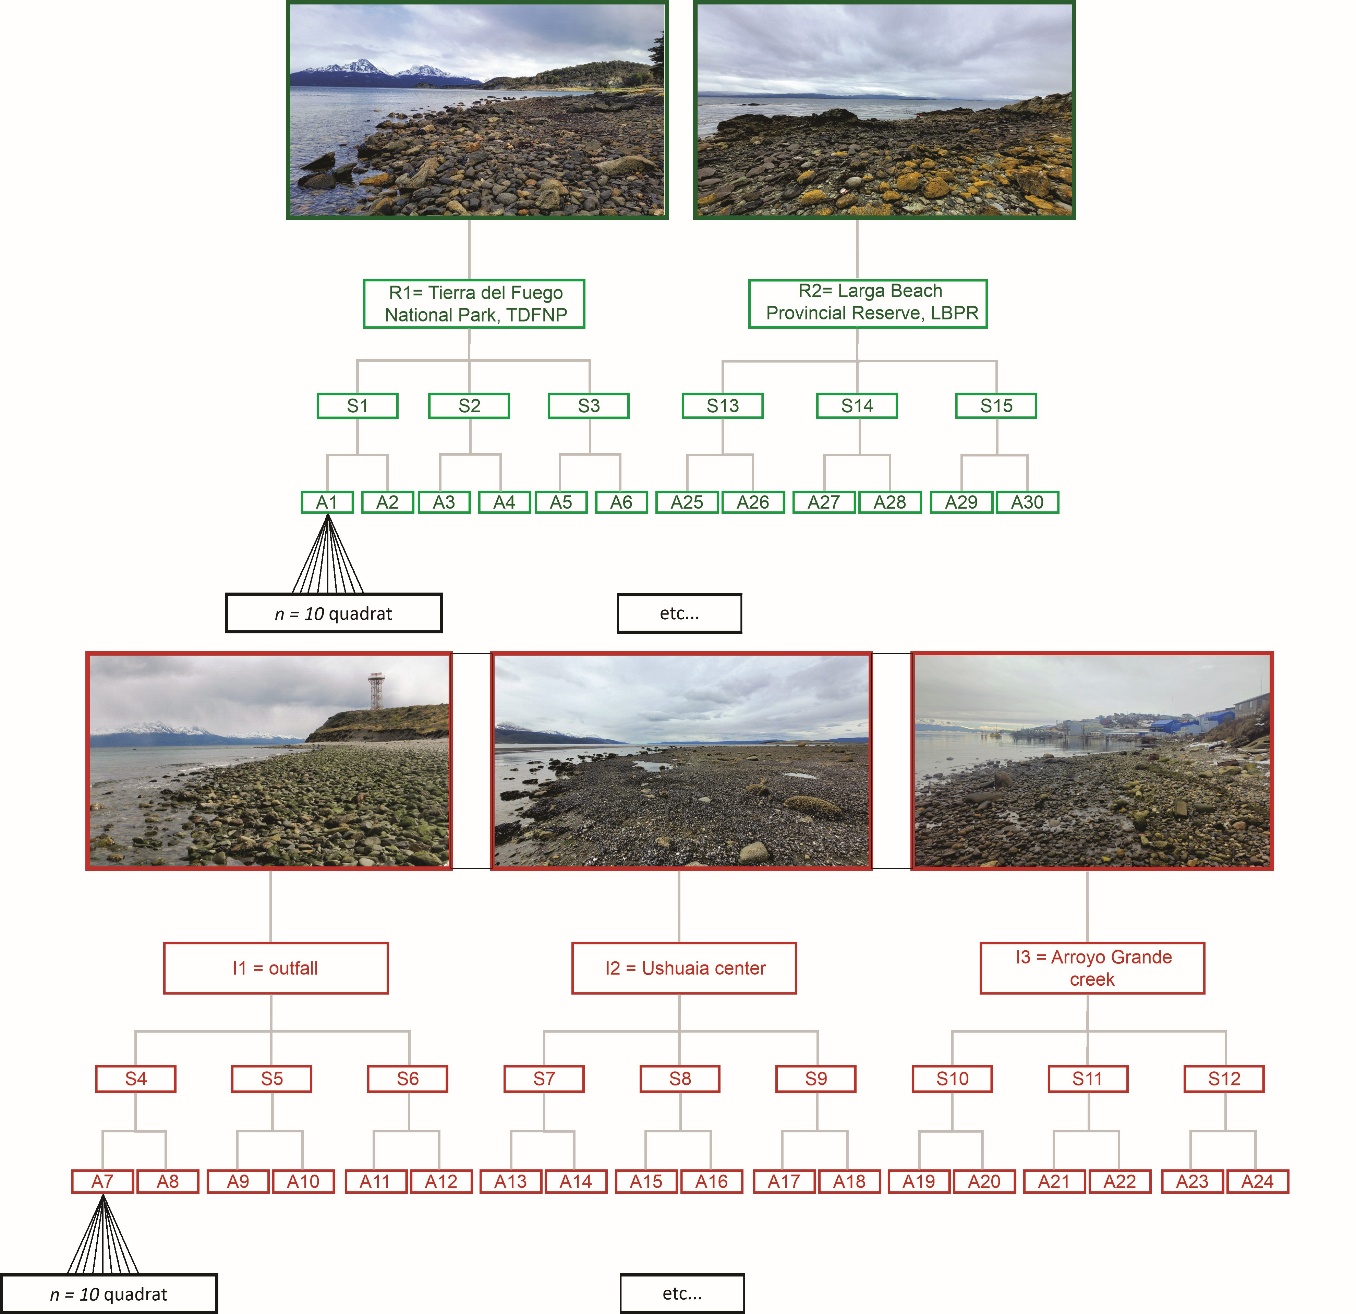


# **S 1.** Hierarchical sampling design was used to assess the effects of a sewage outfall on the intertidal community in the Beagle Channel. The diagram illustrates the spatial structure of the sampling approach, with representative photographs of each condition: reference locations (R1 and R2, shown in green) and impact locations (I1, I2, and I3, shown in red) adjacent to the sewage discharge. The design incorporates nested spatial scales, including locations, sites (S), and areas (A), with 10 quadrats sampled per area.

# **S 2.** List of marine invertebrate and fish species recorded in this study

| **Phyla** | **Class** | **Species/taxon** |
| --- | --- | --- |
| Annelida | Polychaeta | *Hermadion magalhaensis* |
| Nereididae |
| Serpulidae |
| Spionidae |
| *Capitella* *capitata* |
| *Eulalia* sp*.* |
| Terebellidae |
| Glyceridae |
| *Timarete* sp*.* |
| Sabellidae |
| *Urechis chilensis* |
| Sipuncula | *Golfingia* (*Golfingia*) *margaritacea* |
| Arthropoda | Malacostraca | Amphipoda |
| Isopoda |
| *Halicarcinus planatus* |
| Thecostraca | *Balanus laevis* |
| *Notobalanus flosculus* |
| Cnidaria | Hexacorallia | *Parantheopsis cruentata* |
| *Isoparactis fionae* |
| *Bunodactis octoradiata* |
| *Antholoba achates* |
| Ecihnodermata | Asteroidea | *Anasterias antarctica* |
| *Asterina fimbriata* |
| *Ophiactis asperula* |
| Echinoidea | *Loxechinus albus* |
| *Pseudechinus magellanicus* |
| *Ophiophragmus chilensis* |
| *Psolus patagonicus* |
| *Pentactella leonina* |
| Holothuroidea | *Chiridota pisanii* |
| Mollusca | Bivalvia | *Retrotapes exalbidus* |
| *Tawera elliptica* |
| *Hiatella arctica* |
| Polyplacophora | *Tonicia* sp*.* |
| *Ischnochiton stramineus* |
| *Plaxiphora aurata* |
| Gastropoda | *Acanthina monodon* |
| *Argeneuthria cerealis* |
| *Austrolittorina araucana* |
| *Fissurella oriens* |
| *Fissurella picta* |
| *Margarella violacea* |
| *Nacella deaurata* |
| *Nacella flammea* |
| *Nacella magellanica* |
| *Nacella mytilina* |
| Nacella sp. juv. |
| *Pareuthria fuscata* |
| *Savatieria areolata* |
| *Siphonaria lessonii* |
| *Trophon geversianus* |
| *Xymenopsis muriciformis* |
| Nematoda | - | Nematoda |
| Nemertea | Pilidiophora | *Parborlasia corrugata* |
| Porifera | Demospongiae | *Clionaopsis platei* |
| *Crambe chilensis* |
| *Haliclona* (*Reniera*) *porcelana* |
| Chordata | Actinopterygii | *Austrolycus depressiceps* |
| *Harpagifer bispinis* |
| *Patagonotothen cornucola* |

**S 3.** Sample completeness measures of a macrobenthic survey.

For q = 0 (rare species), the sample completeness profile for the Beagle Channel (BC) reached the maximum (Table S1A, Figure S1A). In addition, it was higher in the reference *localities* compared to the impacted *localities* (Table S1A, Figure S1B). The diversities for q = 1 (abundant species) and q = 2 (highly abundant species) were fully recorded in each case (Table S1A, Figure S1A and S1d). Size-based rarefaction curves demonstrated that richness in R2 was higher than in R1, with both surpassing all impacted localities in terms of the number of registered individuals; however, extrapolation in I1 and I2 experienced a sharp increase (Figure S1D). Species richness can be accurately inferred in the BC (Table S1a, Figure S1C); however, data on *localities* allows for inference and significance testing up to a standardised coverage value of Cmax = 98.6% (Table S1a). Below this fraction, q = 1 and q = 2 were higher in reference *localities* than in impacted ones. In contrast, the richness centred on q = 0 was nearly the same in R2 and I1, exceeding those in I2, R1, and I3 in decreasing order. Indeed, the main difference between *localities* lies in the rare species found in I1 and I2 (Table S1B, Figure F). The evenness profile and Pielou measure consistently indicated that evenness among the reference *localities* was higher than in the impacted ones (Table S1A).

| 1. Sample completeness profiles | | | | | | | | |
| --- | --- | --- | --- | --- | --- | --- | --- | --- |
| Region | q = 0 | q = 1 | q = 2 | Locality | q = 0 | q = 1 | q = 2 |
| BC | 100% | 100% | 100% | R1 | 99% | 100% | 100% |
|  |  |  |  | R2 | 99% | 100% | 100% |
|  |  |  |  | I1 | 43% | 100% | 100% |
|  |  |  |  | I2 | 75% | 100% | 100% |
|  |  |  |  | I3 | 90% | 100% | 100% |
| Non-asymptotic coverage-based rarefaction and extrapolation | | | | | | | | |
| Cmax = 100 | | | | Cmax = 98.6 | | | |
| Region | q = 0 | q = 1 | q = 2 | Locality | q = 0 | q = 1 | q = 2 |
| BC | 60 | 11.7 | 6.7 | R1 | 40.5 | 31.1 | 26.6 |
|  |  |  |  | R2 | 50.9 | 32.5 | 26 |
|  |  |  |  | I1 | 50.5 | 26.4 | 20.3 |
|  |  |  |  | I2 | 45.9 | 22.2 | 17.3 |
|  |  |  |  | I3 | 34.1 | 21.5 | 17.7 |
| Evenness | | | | | | | | |
| Region | Pielou J | q = 1 | q = 2 | Locality | Pielou J | q = 1 | q = 2 |
| BC | 0.6 | 0.18 | 0.1 | R1 | 0.93 | 0.76 | 0.65 |
|  |  |  |  | R2 | 0.89 | 0.64 | 0.51 |
|  |  |  |  | I1 | 0.83 | 0.51 | 0.39 |
|  |  |  |  | I2 | 0.81 | 0.47 | 0.36 |
|  |  |  |  | I3 | 0.87 | 0.62 | 0.5 |

| 1. Asymptotic análisis | | | | | |
| --- | --- | --- | --- | --- | --- |
| Localities | qTD | TD:obs | TD:asy | Difference |
| BC | q = 0 | 60 | 60 | 0 |
| BC | q = 1 | 11.78 | 11.78 | 0 |
| BC | q = 2 | 6.77 | 6.77 | 0 |
| R1 | q = 0 | 44 | 44.5 | 0.5 |
| R1 | q = 1 | 9.24 | 9.26 | 0.02 |
| R1 | q = 2 | 4.74 | 4.74 | 0 |
| R2 | q = 0 | 54 | 54.67 | 0.67 |
| R2 | q = 1 | 9.45 | 9.47 | 0.02 |
| R2 | q = 2 | 5.77 | 5.78 | 0.01 |
| I1 | q = 0 | 45 | 105.49 | 60.49 |
| I1 | q = 1 | 6.79 | 6.82 | 0.03 |
| I1 | q = 2 | 4.06 | 4.06 | 0 |
| I2 | q = 0 | 37 | 49.25 | 12.25 |
| I2 | q = 1 | 8.39 | 8.41 | 0.02 |
| I2 | q = 2 | 5.16 | 5.16 | 0 |
| I3 | q = 0 | 37 | 41 | 4 |
| I3 | q = 1 | 8.69 | 8.7 | 0.01 |
| I3 | q = 2 | 5.61 | 5.61 | 0 |


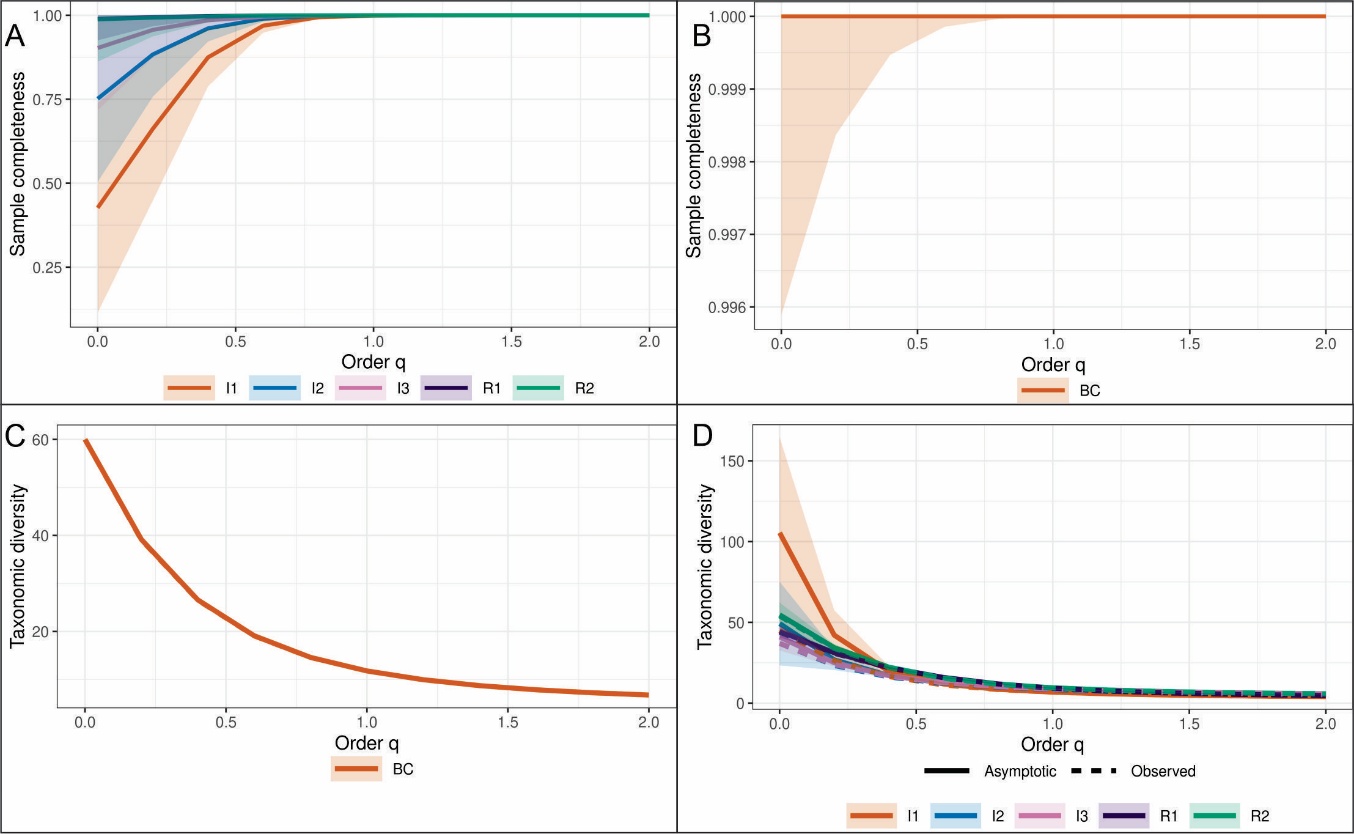


**S 4.** Size-based rarefaction (solid lines) and extrapolation curves (dashed lines) for the Beagle Channel (A) and at each locality (B). BC = Beagle Channel, I1 = impact locality 1 (brown), I2 = impact locality 2 (blue), I3 = impact locality 3 (pink), R1 = reference locality 1 (violet), R2 = reference locality 2 (green). Y axis refer to the estimated asymptotic diversities.

**S 5.** Environmental variables used to assess spatial gradient across sampling sites (S). Smoothed line plots illustrate site-wise trends for salinity (ppt), temperature (°C), pH, turbidity (Turb), total organic matter (TOM), nitrogen/phosphorus ratio (N/P), fecal coliforms (Fec-Col), and total dissolved solids (TDS). Green and red line segments represent distinct site groupings: reference sites (S1–S3 and S13–S15, shown in green) and impacted sites (S4–S12, shown in red). Overall, variables such as TOM, Fec-Col, TDS and Turb showed highest values in impacted sites while N/P displayed an opposite pattern.


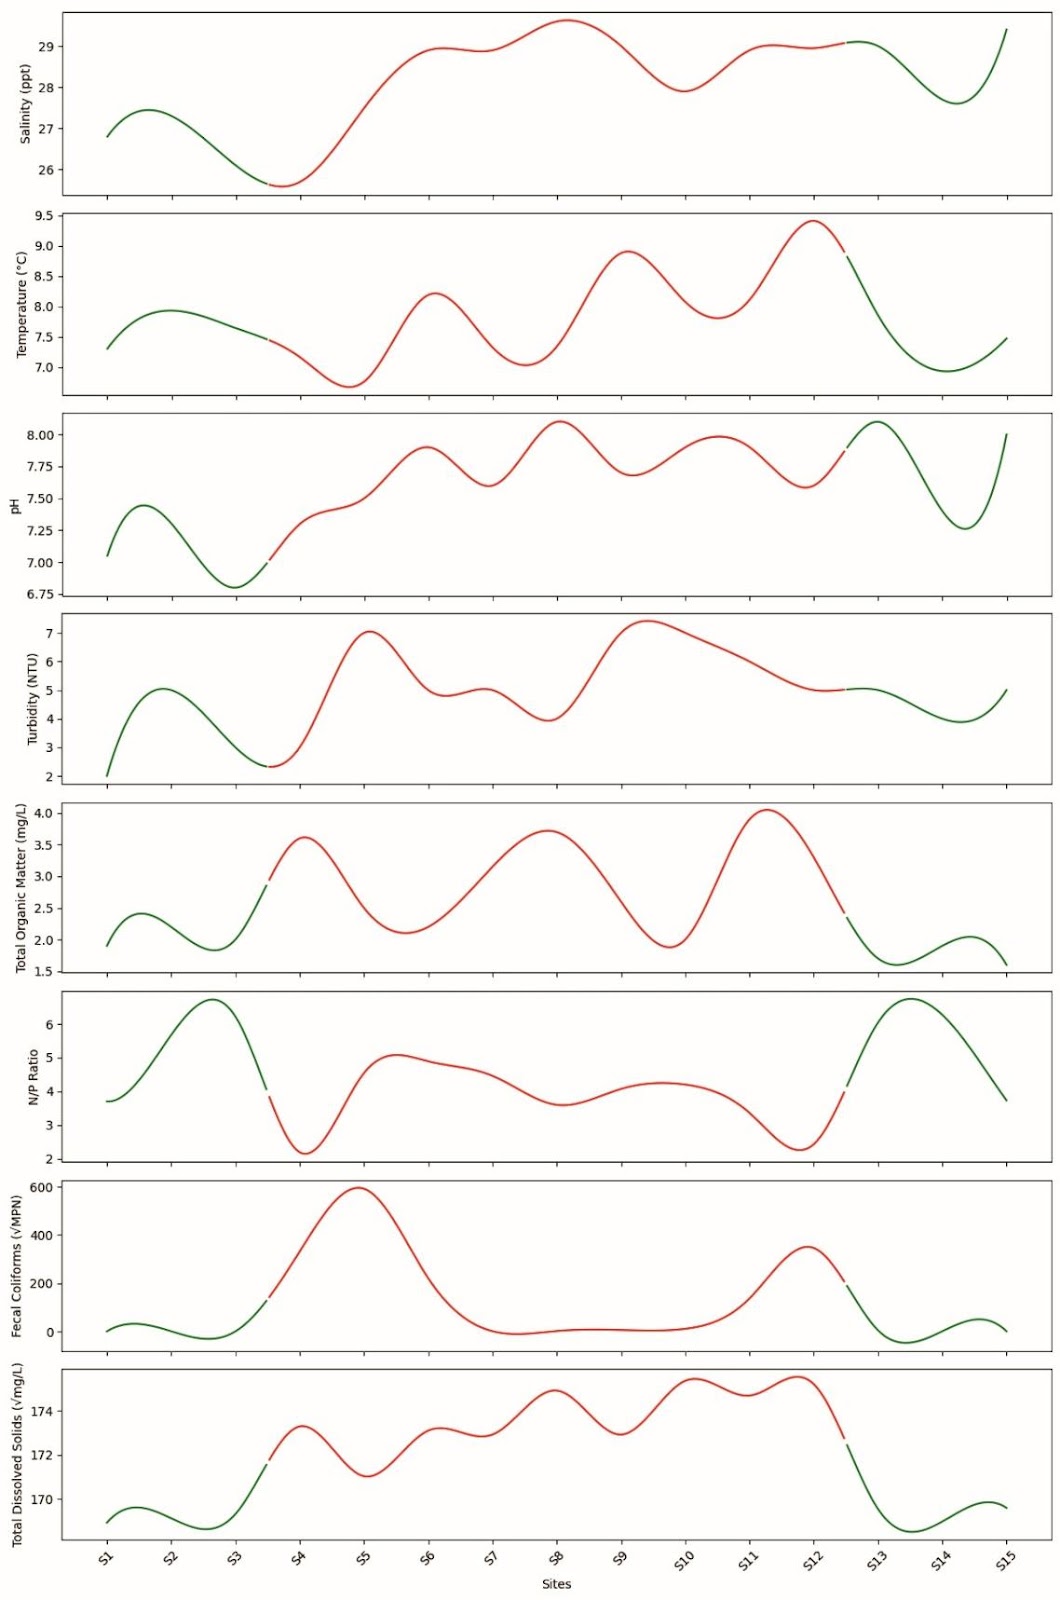

Supplement: Supplementary file 1 [file 9c41f3bd3b0cf92df0e52794.docx]
